# Supplementary material
Source: Frontiers journal article supplement (https://www.frontiersin.org/articles/275793)
Supplement: Data_Sheet_1.ZIP [file Data_Sheet_1.ZIP]

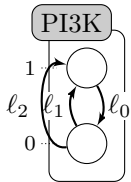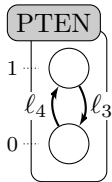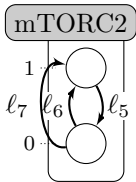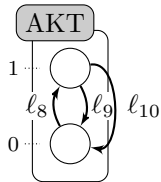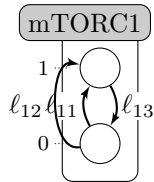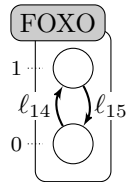

$$\ell_0 = \{PTEN_1, mTORC1_1\}$$

$$\ell_1 = \{PTEN_0\}$$

$$\ell_2 = \{mTORC1_0\}$$

$$\ell_3 = \{PI3K_1\}$$

$$\ell_4 = \{PI3K_0\}$$

$$\ell_5 = \{mTORC1_1, PI3K_0, FOXO_0\}$$

$$\ell_6 = \{PI3K_1\}$$

$$\ell_7 = \{FOXO_1\}$$

$$\ell_8 = \{PI3K_1, mTORC2_1\}$$

$$\ell_9 = \{mTORC2_0\}$$

$$\ell_{10} = \{PI3K_0\}$$

$$\ell_{11} = \{AKT_1, FOXO_0\}$$

$$\ell_{12} = \{FOXO_0\}$$

$$\ell_{13} = \{FOXO_1\}$$

$$\ell_{14} = \{AKT_0, mTORC1_1\}$$

$$\ell_{15} = \{AKT_1\}$$
